# Supplementary material for: Direct Oral Anticoagulants and Timing of Hip Fracture Surgery
Source: PubMed Central journal article supplement (PMC7408859; doi:10.3390/jcm9072200), 2020-07-12
Supplement: jcm-09-02200-s001.pdf [file jcm-09-02200-s001.pdf]

**Supplement Table 1.** Additional descriptive statistics of demographic variables.

| Variables                          | Total (n=112) |
|------------------------------------|---------------|
| Comorbidities (n,%)                |               |
| Ischaemic Heart Disease            | 31 (28%)      |
| Congestive Cardiac Failure         | 33 (29%)      |
| Atrial Fibrillation                | 101 (90%)     |
| Deep Vein Thrombosis               | 7 (6.3%)      |
| Pulmonary Embolus                  | 7 (6.3%)      |
| Cerebrovascular Disease            | 33 (29%)      |
| Hypertension                       | 68 (61%)      |
| Chronic Renal Failure              | 15 (13%)      |
| Diabetes Mellitus                  | 15 (13%)      |
| Gastrooesophageal Disease          | 25 (22%)      |
| Chronic Airway Disease             | 16 (14%)      |
| Malignancy                         | 11 (9.8%)     |
| Comorbidity Scores (median, Q1-Q3) |               |
| Nottingham Hip Fracture Score      | 5 (4-6)       |
| Revised Cardiac Risk Index         | 1 (0-2)       |

**Supplement Table 2.** Arthroplasty vs fixation demographic variables and outcomes.

| Variables                                       | Arthroplasty (n = |                   | p value |
|-------------------------------------------------|-------------------|-------------------|---------|
|                                                 | 29)               | Fixation (n = 82) |         |
| Age (years; mean, SD)                           | 83.3 ( $\pm$ 5.5) | 84.7 ( $\pm$ 6.3) | 0.294   |
| Sex (Female; n, %)                              | 17 (59%)          | 59 (71%)          | 0.184   |
| Cognition (Impaired; n, %)                      | 8 (27%)           | 27 (33%)          | 0.595   |
| CCI (median, Q1-Q3)                             | 2 (2-2)           | 1 (0-3)           | 0.498   |
| Time to Surgery from Last Dose (days; mean, SD) | 2.6 ( $\pm$ 0.9)  | 2.1 ( $\pm$ 1.0)  | 0.026   |
| Cause of Delay (reason; n,%)                    |                   |                   |         |
| DOAC                                            | 13 (45%)          | 24 (29%)          | 0.127   |
| Lack of surgical time                           | 10 (35%)          | 25 (30%)          | 0.691   |
| Medical optimisation                            | 5 (17%)           | 14 (17%)          | 0.984   |
| ASA Score (Grade; n, %)                         |                   |                   |         |
| 2                                               | 2 (6.9%)          | 9 (11%)           | 0.689   |
| 3                                               | 21 (72%)          | 50 (61%)          |         |
| 4                                               | 6 (21%)           | 22 (27%)          |         |
| 5                                               | 0 (0.0%)          | 1 (1.2%)          |         |
| Anaesthetic (n, %)                              |                   |                   |         |
| General anaesthetic                             | 26 (90%)          | 70 (85%)          | 0.561   |
| Neuraxial anaesthetic                           | 3 (10%)           | 12 (15%)          |         |

|                                      |           |           |              |
|--------------------------------------|-----------|-----------|--------------|
| Transfusion ( <i>n</i> ,%)           |           |           |              |
| Preoperative                         | 2 (6.9%)  | 6 (7.3%)  | 0.940        |
| Intraoperative                       | 2 (6.9%)  | 4 (4.9%)  | 0.679        |
| Postoperative                        | 3 (10%)   | 19 (23%)  | 0.136        |
| Haemoglobin (g/dL; mean, SD)         |           |           |              |
| Admission                            | 129 (±14) | 123 (±16) | 0.061        |
| Day 1 postoperative                  | 112 (±14) | 100 (±17) | <b>0.003</b> |
| Drop                                 | 19 (±13)  | 22 (±14)  | 0.212        |
| Serious Adverse Event ( <i>n</i> ,%) | 6 (21%)   | 19 (23%)  | 0.783        |
| 30-day Mortality ( <i>n</i> ,%)      | 2 (6.9%)  | 13 (16%)  | 0.225        |

---

ASA- American Society of Anesthesiologist; CCI- Charlson Comorbidity Index; DOAC- direct oral anticoagulant.

Supplement Table 3. Demographics and outcomes of 30-day Mortality.

| Demographics |        | Comorbidity Scores |     | Preoperative Medical condition | Operative Delay and Reasons |                      |                     | Operative Details            |                       |                   | Outcomes | Mortality                        |            | Cause of Death |                |                       |                           |                                                              |
|--------------|--------|--------------------|-----|--------------------------------|-----------------------------|----------------------|---------------------|------------------------------|-----------------------|-------------------|----------|----------------------------------|------------|----------------|----------------|-----------------------|---------------------------|--------------------------------------------------------------|
| Age (years)  | Sex    | Dementia (y/n)     | CCI | NHS                            | Delay (Days)                | Medical Optimization | Optimization needed | Lack of Operative Time (y/n) | Delayed to DOAC (y/n) | Transfusion (y/n) | ASA      | Time to OR from admission (days) | Postop SAE |                | Delirium (y/n) | Length of Stay (days) | Inpatient Mortality (y/n) |                                                              |
| 87           | Male   | No                 | 9   | 6                              | Exacerbation of COPD        | 0                    | No                  |                              | No                    | No                | Yes      | 3                                | 1.3        |                | No             | 6                     | No                        | Palliated with pneumonia post re-admission (suicide attempt) |
| 89           | Male   | No                 | 4   | 6                              |                             | 3                    | No                  |                              | No                    | Yes               | No       | 3                                | 4.4        |                | No             | 7                     | No                        | Right sided heart failure / AMI                              |
| 87           | Female | No                 | 1   | 5                              | rAF                         | 3                    | Yes                 | rAF workup                   | No                    | No                | No       | 4                                | 3.9        | LRTI           | No             | 12                    | Yes                       | Sepsis post-aspiration pneumonia                             |
| 92           | Female | No                 | 8   | 6                              |                             | 2                    | No                  |                              | No                    | Yes               | No       | 3                                | 3.3        | RF             | No             | 4                     | Yes                       | Respiratory failure from sepsis                              |
| 86           | Male   | Yes                | 3   | 7                              | rAF                         | 2                    | Yes                 | rAF workup                   | No                    | No                | No       | 4                                | 4.2        |                | No             | 6                     | No                        | Not known                                                    |
| 89           | Male   | No                 | 2   | 7                              |                             | 3                    | No                  |                              | No                    | Yes               | Yes      | 4                                | 4.7        | LRTI           | No             | 7                     | Yes                       | Sepsis post-pneumonia                                        |
| 90           | Female | No                 | 3   | 5                              | Heart failure               | 1                    | Yes                 | Echocardiogram               | No                    | No                | No       | 3                                | 3.5        |                | No             | 3                     | Yes                       | Cerebrovascular accident                                     |

|    |        |     |   |   |                       |     |     |                |     |     |     |   |     |        |     |    |     |                                                      |
|----|--------|-----|---|---|-----------------------|-----|-----|----------------|-----|-----|-----|---|-----|--------|-----|----|-----|------------------------------------------------------|
| 87 | Female | Yes | 1 | 7 |                       | 1   | No  |                | Yes | No  | No  | 4 | 0.9 | PE     | Yes | 5  | No  | Respiratory failure from bilateral pulmonary embolus |
| 91 | Male   | Yes | 1 | 7 |                       | 0   | No  |                | No  | No  | No  | 4 | 0.7 |        | Yes | 3  | No  | Sepsis and multiorgan failure                        |
| 97 | Female | No  | 5 | 6 | Acute pulmonary odema | 1   | Yes | Diuresis       | No  | No  | No  | 4 | 1.8 | LRTI   | No  | 3  | Yes | Congestive heart failure                             |
| 86 | Female | No  | 7 | 5 |                       | 0   | No  |                | No  | No  | No  | 3 | 0.8 | AMI    | No  | 1  | Yes | Fat embolism                                         |
| 83 | Male   | Yes | 2 | 6 |                       | 0   | No  |                | No  | No  | Yes | 3 | 0.7 | AKI    | Yes | 10 | No  | Aspiration pneumonia                                 |
| 79 | Male   | No  | 8 | 7 | Anaemic               | 2   | Yes | Echocardiogram | No  | Yes | Yes | 4 | 2.3 | AKI    | No  | 3  | No  | Haemorrhagic shock                                   |
| 92 | Female | No  | 1 | 4 |                       | 2   | No  |                | No  | Yes | No  | 3 | 2.3 |        | No  | 8  | No  | Not known                                            |
| 86 | Male   | Yes | 2 | 6 |                       | N/A |     |                |     |     |     |   |     | Non-op | No  | 0  | Yes | Pneumonia                                            |
| 94 | Male   | Yes | 3 | 9 | NSTEMI                | 1   | Yes | Diuresis       | No  | No  | No  | 4 | 2.0 | AKI    | Yes | 10 | Yes | AMI                                                  |

AKI- Acute Kidney Injury; AMI- Acute Myocardial Infarction; CCI-Charlson Comorbidity Index; COPD-Chronic Obstructive Pulmonary Disease; LRTI- Lower Respiratory Tract Infection; Nottingham Hip Fracture Score- NHFS; NSTEMI- Non ST-elevation Myocardial Infarction; OR- Operating Room; PE- pulmonary embolism; rAF- Rapid Atrial Fibrillation; RF- Respiratory Failure; SAE- Serious Adverse Event.

**Supplement Table 4.** Serious Adverse Events (SAE) & Mortality.

| SAE          | SAE timing<br>postadmission<br>(days) | Delirium<br>(y/n) | ICU<br>admission<br>(y/n) | Length of<br>Stay (days) | Inpatient<br>Mortality<br>(y/n) | 30-day<br>Mortality (y/n) |
|--------------|---------------------------------------|-------------------|---------------------------|--------------------------|---------------------------------|---------------------------|
| LRTI         | 2.9                                   | No                | No                        | 15                       | No                              | No                        |
| PE           | 9.7                                   | No                | Yes                       | 40                       | No                              | No                        |
| AKI          | 1.0                                   | No                | No                        | 30                       | No                              | No                        |
| RF           | 16.5                                  | Yes               | No                        | 31                       | No                              | No                        |
| LRTI         | 2.9                                   | No                | No                        | 7                        | Yes                             | Yes                       |
| CVA          | 2.9                                   | No                | No                        | 15                       | No                              | No                        |
| PE           | 3.7                                   | Yes               | No                        | 5                        | No                              | Yes                       |
| LRTI         | 6.8                                   | No                | No                        | 10                       | No                              | No                        |
| LRTI         | 0.4                                   | No                | No                        | 3                        | Yes                             | Yes                       |
| AMI          | 0.9                                   | No                | No                        | 0                        | Yes                             | Yes                       |
| AKI          | 1.2                                   | Yes               | No                        | 10                       | No                              | Yes                       |
| GIH          | 6.8                                   | Yes               | No                        | 22                       | No                              | No                        |
| LTRI         | 12.4                                  | Yes               | No                        | 19                       | No                              | No                        |
| LRTI         | 2.8                                   | Yes               | No                        | 10                       | No                              | No                        |
| CCF          | 10.3                                  | Yes               | No                        | 25                       | No                              | No                        |
| AKI          | 0.9                                   | No                | No                        | 14                       | No                              | No                        |
| Sepsis       | 14.6                                  | No                | No                        | 15                       | No                              | No                        |
| AKI          | 1.9                                   | No                | No                        | 3                        | No                              | Yes                       |
| LRTI         | 2.4                                   | Yes               | No                        | 8                        | No                              | No                        |
| LRTI         | 11.6                                  | No                | No                        | 12                       | No                              | No                        |
| Sepsis       | 3.3                                   | No                | No                        | 24                       | No                              | No                        |
| AMI          | 11.8                                  | No                | No                        | 14                       | No                              | No                        |
| AKI / NSTEMI | 0.4                                   | Yes               | No                        | 10                       | Yes                             | Yes                       |
| AKI          | 1.7                                   | No                | No                        | 22                       | No                              | No                        |
| AKI          | 1.8                                   | No                | No                        | 10                       | No                              | No                        |

AKI- Acute Kidney Injury; AMI- Acute Myocardial Infarction; ICU- Intensive Care Unit; LRTI- Lower Respiratory Tract Infection; NSTEMI- Non ST-elevation Myocardial Infarction; PE- pulmonary embolism; RF- Respiratory Failure; SAE- Serious Adverse Event.

**Supplement Table 5.** Matched control vs DOAC variables and outcomes.

| Variables                  | Control (n = 112) | DOAC (n = 112) | p value |
|----------------------------|-------------------|----------------|---------|
| Age (years; mean, SD)      | 84.3 (±6.1)       | 84.3 (±6.1)    | 0.983   |
| Sex (Female; n, %)         | 76 (68%)          | 76 (68%)       | 1.000   |
| Cognition (Impaired; n, %) | 27 (24%)          | 36 (32%)       | 0.181   |

|                                                 |              |             |                  |
|-------------------------------------------------|--------------|-------------|------------------|
| Ischaemic Heart Disease ( <i>n</i> , %)         | 13 (12%)     | 31 (28%)    | <b>0.002</b>     |
| Chronic Renal Failure ( <i>n</i> , %)           | 7 (6.2%)     | 15 (13%)    | 0.072            |
| Diabetes Mellitus ( <i>n</i> , %)               | 5 (4.6%)     | 15 (13%)    | <b>0.019</b>     |
| Time to Surgery from Admission (days; mean, SD) | 1.2 (±0.7)   | 1.8 (±1.3)  | <b>&lt;0.001</b> |
| Cause of Delay (reason; <i>n</i> ,%)            |              |             |                  |
| DOAC                                            | N/A          | 37 (33%)    | -                |
| Lack of surgical time                           | 19 (17%)     | 35 (31%)    | <b>0.008</b>     |
| Medical optimisation                            | 2 (1.8%)     | 19 (17%)    | <b>&lt;0.001</b> |
| ASA Score (Grade; <i>n</i> , %)                 |              |             | 0.096            |
| 2                                               | 23 (21%)     | 11 (9.9%)   |                  |
| 3                                               | 67 (60%)     | 71 (64%)    |                  |
| 4                                               | 21 (19%)     | 28 (25%)    |                  |
| 5                                               | 0 (0%)       | 1 (0.9%)    |                  |
| Anaesthetic ( <i>n</i> , %)                     |              |             | <b>&lt;0.001</b> |
| General anaesthetic                             | 55 (50%)     | 96 (86%)    |                  |
| Neuraxial anaesthetic                           | 56 (50%)     | 15 (14%)    |                  |
| Operation type ( <i>n</i> , %)                  |              |             | <b>0.038</b>     |
| Cemented hemiarthroplasty                       | 36 (32%)     | 20 (18%)    |                  |
| Cannulated screws                               | 13 (12%)     | 9 (8.1%)    |                  |
| Dynamic hip screw                               | 5 (4.5%)     | 4 (3.6%)    |                  |
| Long femoral nail                               | 15 (14%)     | 29 (26%)    |                  |
| Short femoral nail                              | 30 (27%)     | 40 (36%)    |                  |
| Uncemented hemiarthroplasty                     | 3 (2.7%)     | 6 (5.4%)    |                  |
| Total hip replacement                           | 9 (8.1%)     | 3 (2.7%)    |                  |
| Length of Stay (days; median, Q1–Q3)            | 6.9 (4.2–11) | 11 (6.5–18) | <b>&lt;0.001</b> |
| Inpatient Mortality ( <i>n</i> ,%)              | 1 (0.9%)     | 8 (7.1%)    | <b>0.017</b>     |
| 30-day Mortality ( <i>n</i> ,%)                 | 7 (6.3%)     | 16 (14%)    | 0.225            |

ASA- American Society of Anesthesiologist; DOAC- direct oral anticoagulant.
